# Supplementary material for: Population-level morphological analysis of paired CO2- and odor-sensing olfactory neurons in D. melanogaster via volume electron microscopy
Source: eLife. 2025 Jul 25;14:RP106389. doi: 10.7554/eLife.106389 (PMC12296258; doi:10.7554/eLife.106389)
Supplement: Figure 1—source data 1. [file elife-106389-fig1-data1.xlsx]

## Sheet: Fig 1. ab1 sensillum analysis
Model #	Length (um)	Surface Area (um^2)	Volume (um^3)	Cross-section area (um^2)	# of dendrites at mid point	Shown in Fig 1B	Notes
26	10.85	89.1187	41.924	2.09482	65	1st sample image
1	9.825	87.445	43.9169	2.11703	96
38	9.45	100.903	50.7309	3.07247	98
19	8.975	101.162	49.6985	2.11779	102
39	8.5	89.1696	41.4865	2.42581	105
18	10.675	95.5746	48.4952	2.31115	114
10	10.075	91.6488	41.4533	1.84268	115
28	9.45	100.959	50.507	2.74893	116	2nd sample image
14	7.825	96.2615	46.9059	2.09885	117
23	8.8	95.0186	47.39	2.52578	119
15	10.5	99.9981	49.8674	2.36793	122
27	8.925	79.8004	38.0828	2.26319	122
31	NA	NA	NA	3.35499	122		partical cutoff at distal end, excluded in the analysis
24	10.675	91.4999	44.2505	2.14512	126
29	NA	NA	NA	2.86214	127		partical cutoff at distal end, excluded in the analysis
13	8.2	97.208	47.5125	2.09881	130
8	9.625	100.845	48.8355	2.23358	133
22	8.875	102.457	54.6321	2.66527	135
9	10.525	92.1841	45.4602	2.31296	138
6	10.35	93.8135	46.3017	2.11462	138	3rd sample image
25	10.075	95.6122	48.1108	2.66772	142
2	11.3	83.5113	39.4977	2.1655	150
4	8.925	87.5325	43.4642	2.4406	153	4th sample image
37	9.2	84.5128	39.9672	2.38346	154
7	9.75	92.2555	45.1155	2.32647	163
3	8.875	96.2291	48.6154	2.76761	163
20	8.075	98.1321	48.2895	2.27588	169
12	8.175	101.712	51.177	2.50599	172	5th sample image
21	9.5	99.1258	50.2127	2.54881	172
5	10.4	94.4401	47.8555	2.06213	173
17	8.4	90.876	43.9835	2.17457	178
16	11.375	87.3258	43.1402	2.3714	209	6th sample image
11	8.375	89.9187	41.852	2.27094	NA		Insufficient image quality; unable to count dendrites
Mean	9.50081	93.75	46.0881	2.38591	135.562
Standard Deviation (SD)	0.980916	5.82546	3.90574	0.313068	29.283
Coefficient of Variation (CV)	0.103246	0.0621382	0.0847449	0.131216	0.216011
