# Supplementary material for: Population-level morphological analysis of paired CO2- and odor-sensing olfactory neurons in D. melanogaster via volume electron microscopy
Source: eLife. 2025 Jul 25;14:RP106389. doi: 10.7554/eLife.106389 (PMC12296258; doi:10.7554/eLife.106389)
Supplement: Figure 2—source data 1. [file elife-106389-fig2-data1.xlsx]

## Sheet: Fig 2. ab1 ORN morphometrics
		Soma V (um3)					Inner Dendrite V (um3)					Outer Dendrite V (um3)
SBEM Volume	Model No.	A	B	C	D		A	B	C	D		A	B	C	D
Current study: Or7a(3), Figure 2	26	45.1995	34.77	44.28	21.93		16.6197	15.9943	8.89068	3.75941		4.76411	2.95185	3.33829	0.894849
Or7a(1) from Nava Gonzales, et al, 2021, Table 2 & Figure 6A	40	65.82	65.07	51.1007	29.721		24.0211	21.9813	7.355	2.82		NA	NA	NA	NA
Or7a(1) from Nava Gonzales, et al, 2021, Table 2	41	74.101	56.85	53.1016	26.347		14.7668	20.3257	6.0952	2.847		NA	NA	NA	NA
Or7a(1) from Nava Gonzales, et al, 2021, not included	42	NA	NA	NA	NA		NA	NA	NA	NA		7.19669	6.21272	4.00062	0.700106
		Soma SA (um2)					Inner Dendrite SA (um2)					Outer Dendrite SA (um2)
Note:	Model No.	A	B	C	D		A	B	C	D		A	B	C	D
Model 40 and 41 were truncated in the outer dendritic regions.	26	97.0363	82.4202	89.2136	60.6196		41.5167	50.0614	29.8649	22.6754		125.55	67.04	46.3825	22.9253
Model 42 was truncated in the somatic and inner dendritic regions.	40	116.209	102.107	104.754	62.1724		70.2369	59.1747	31.0392	18.3852		NA	NA	NA	NA
	41	119.313	94.3361	105.707	59.8243		56.1933	81.9687	28.6359	21.4542		NA	NA	NA	NA
	42	NA	NA	NA	NA		NA	NA	NA	NA		199.35	114.64	42.9672	13.2932
							Inner Dendrite Length (um)					Outer Dendrite Total Length (um)
						Model No.	A	B	C	D		A	B	C	D
						26	5.71	7.8	6.68	8.64		369.49	181.23	15.65	53.59
						40	7.17	6.89	7.16	5.79		NA	NA	NA	NA
						41	8.8	9.76	10.68	7.67		NA	NA	NA	NA
						42	NA	NA	NA	NA		323.86	226.1	33.56	19.61
												Outer Dendrite Branch Number
											Model No.	A	B	C	D
											26	67	37	2	7
											40	NA	NA	NA	NA
											41	NA	NA	NA	NA
											42	123	87	1	1
