# Supplementary material for: Population-level morphological analysis of paired CO2- and odor-sensing olfactory neurons in D. melanogaster via volume electron microscopy
Source: eLife. 2025 Jul 25;14:RP106389. doi: 10.7554/eLife.106389 (PMC12296258; doi:10.7554/eLife.106389)
Supplement: Figure 4—source data 1. [file elife-106389-fig4-data1.xlsx]

## Sheet: Fig 4. ab1C den. morphometrics
Relative to cuticle	Model	Categoriy	Figure	Flattening point (FP)	Dendritic terminus (DT)		Length (micron)	Model	Ciliary constriction to FP	FP to DT		Surface area (micron^2)	Model	Ciliary constriction to FP	FP to DT		Volume (micron^3)	Model	Ciliary constriction to FP	FP to DT		V/L ratio	Model	Ciliary constriction to FP	FP to DT		S/V ratio	Model	Ciliary constriction to FP	FP to DT
(0: base; 1: tip)	1	Loosely curled	—	0.238769	0.601684			1	9.64	4.28			1	16.8989	23.4794			1	2.17406	0.891245			1	0.225525	0.208235			1	7.77297	26.3445
	2	Fully curled	—	0.257553	0.821387			2	10.68	6.21			2	21.0197	23.9335			2	3.15023	1.0429			2	0.294965	0.167938			2	6.67243	22.9491
	3	Loosely curled	Fig 3B-5	0.467644	0.922969			3	11.39	5.33			3	21.2653	24.9084			3	2.68582	0.988181			3	0.235805	0.1854			3	7.91762	25.2063
	4	Mixed	Fig 3E-1	0.32336	0.95075			4	9.68	7.09			4	17.4694	37.2766			4	2.21524	1.7178			4	0.228847	0.242285			4	7.88601	21.7002
	6	Split	Fig 3D-1	0.516351	0.958893			6	10.81	5.43			6	18.6869	11.9864			6	2.5057	0.607869			6	0.231795	0.111946			6	7.45776	19.7187
	7	Loosely curled	Fig 3B-1	0.357695	0.880718			7	9.7	5.91			7	18.2308	26.3978			7	2.3169	1.18861			7	0.238856	0.201118			7	7.86862	22.209
	8	Fully curled	Fig 3C-1	0.530001	0.957686			8	12.64	5.45			8	21.9922	21.9009			8	2.66379	1.00771			8	0.210743	0.184901			8	8.25598	21.7333
	9	Split	Fig 3D-2	0.296038	0.671456			9	10.47	4.69			9	22.5708	24.4384			9	2.95752	1.1501			9	0.282476	0.245224			9	7.63166	21.2489
	10	Loosely curled	Fig 3B-3	0.434537	0.951561			10	11.06	6.45			10	21.7614	26.3923			10	2.86129	1.07206			10	0.258706	0.166211			10	7.60545	24.6183
	11	Loosely curled	—	0.571945	0.962874			11	11.19	4.37			11	21.1144	16.9599			11	2.50209	0.931412			11	0.223601	0.213138			11	8.43871	18.2088
	12	Loosely curled	—	0.324139	0.921363			12	12.57	7.24			12	22.3137	17.0024			12	3.05384	0.815627			12	0.242947	0.112656			12	7.30677	20.8458
	13	Loosely curled	—	0.427111	0.893465			13	10.73	5.65			13	20.6878	27.8763			13	2.84949	1.27445			13	0.265563	0.225566			13	7.26018	21.8732
	14	Loosely curled	Fig 3B-4	0.44894	0.92971			14	10.48	5.76			14	21.2455	28.6837			14	2.70415	1.40319			14	0.25803	0.243609			14	7.85663	20.4418
	15	Fully curled	—	0.470794	0.970664			15	11.07	6.01			15	18.2548	33.1225			15	2.4929	1.45794			15	0.225194	0.242586			15	7.32272	22.7187
	16	Loosely curled	—	0.177653	0.662357			16	9.36	5.51			16	16.1494	22.093			16	2.106	0.990349			16	0.225	0.179737			16	7.66828	22.3083
	17	Mixed	Fig 3E-2	0.356417	0.969902			17	9.86	7.64			17	19.7021	26.1224			17	2.47661	0.888319			17	0.251177	0.116272			17	7.95527	29.4065
	18	Loosely curled	—	0.356518	0.942357			18	10.37	6.71			18	18.5816	25.7356			18	2.52608	1.06614			18	0.243595	0.158888			18	7.3559	24.139
	19	Fully curled	Fig 3C-3	0.480231	0.978215			19	11.89	6.2			19	22.6262	23.896			19	2.75896	0.723955			19	0.23204	0.116767			19	8.20099	33.0076
	22	Loosely curled	Fig 3B-2	0.465985	0.901545			22	11.03	5.13			22	21.79	22.9588			22	3.04538	1.09994			22	0.2761	0.214413			22	7.1551	20.8728
	23	Loosely curled	—	0.42839	0.95366			23	10.52	6.12			23	17.4647	25.9254			23	2.12471	1.10497			23	0.201969	0.180551			23	8.2198	23.4625
	26	Mixed	Fig 2E	0.257475	0.81841			26	8.61	7.04			26	17.0432	26.5034			26	2.51209	1.0307			26	0.291764	0.146407			26	6.78447	25.7139
	27	Split	Fig 3D-3	0.528521	0.854521			27	11.56	3.82			27	22.5387	22.4221			27	3.41056	1.01268			27	0.295031	0.265099			27	6.6085	22.1413
	37	Loosely curled	—	0.291638	0.787947			37	10.34	5.69			37	20.2518	21.8738			37	2.93047	0.913677			37	0.283411	0.160576			37	6.91077	23.9404
	38	Split	—	0.452163	0.876852			38	10.2	5.18			38	17.5184	25.1705			38	2.30785	0.88554			38	0.22626	0.170954			38	7.59079	28.4239
	39	Fully curled	Fig 3C-2	0.507473	0.906665			39	12.18	4.7			39	19.6289	19.7653			39	2.56445	0.55674			39	0.210546	0.118455			39	7.65423	35.5019
	AVE			0.398694	0.881904			AVE	10.7212	5.7444			AVE	19.8723	24.273			AVE	2.63585	1.03288			AVE	0.246398	0.183157			AVE	7.5743	23.9494
	SD			0.104317	0.10129			SD	0.966558	0.948106			SD	2.03428	4.91183			SD	0.332962	0.248009			SD	0.0273701	0.045663			SD	0.485296	3.95877
	CV			0.261648	0.114854			CV	0.0901539	0.165049			CV	0.102368	0.202358			CV	0.126321	0.240113			CV	0.111081	0.24931			CV	0.0640713	0.165297
