# Supplementary material for: Population-level morphological analysis of paired CO2- and odor-sensing olfactory neurons in D. melanogaster via volume electron microscopy
Source: eLife. 2025 Jul 25;14:RP106389. doi: 10.7554/eLife.106389 (PMC12296258; doi:10.7554/eLife.106389)
Supplement: Figure 6—source data 1. [file elife-106389-fig6-data1.xlsx]

## Sheet: Fig 6. ab1D den. morphometrics
Relative to cuticle	Model	# of branches	Primary branch point	last dendritic tip		Length (micron)	Model	Ciliary constriction to primary branch point	Distal branched segments (summed)	Total		Surface area (micron^2)	Model	Ciliary constriction to primary branch point	Distal branched segments (summed)	Total		Volume (micron^3)	Model	Ciliary constriction to primary branch point	Distal branched segments (summed)	Total
	1	1					1			18.61			1			14.2904			1			0.786118
	2	6	0.275743	0.898887			2	10.45	22.2	32.65			2	6.57	11.9366	18.5066			2	0.463594	0.386912	0.850506
	3	6	0.181681	0.935451			3	8.22	39.72	47.94			3	8.63715	14.352	22.9891			3	0.578665	0.375707	0.954372
	4	1					4			17.13			4			12.1495			4			0.534626
	6	1					6			19.21			6			13.67			6			0.684089
	7	2	0.0992834	0.953467			7	7.1	17.7	24.8			7	5.82868	5.99883	11.8275			7	0.287899	0.14298	0.430879
	8	5	0.304675	0.969259			8	10.39	37.28	47.67			8	12.1852	13.8916	26.0768			8	0.767616	0.367767	1.13538
	9	1					9			15.17			9			11.8519			9			0.77047
	10	1					10			18.04			10			13.4104			10			0.622891
	11	1					11			14.23			11			11.7652			11			0.637194
	13	5	0.110292	0.875342			13	8.07	35.98	44.05			13	10.2175	13.9217	24.1392			13	0.723258	0.370267	1.09353
	14	7	0.223732	0.876958			14	10.27	31.14	41.41			14	11.1974	11.1278	22.3252			14	0.742008	0.288687	1.0307
	15	4	0.207779	0.633236			15	8.55	11.73	20.28			15	8.3836	5.2202	13.6038			15	0.611529	0.150028	0.761557
	17	1					17			17.29			17			13.8571			17			0.730552
	18	5	0.140211	0.956625			18	8.38	27.58	35.96			18	9.58102	9.90901	19.49			18	0.678815	0.243967	0.922782
	19	1					19			20.09			19			15.3038			19			0.736521
	23	4	0.271725	0.925553			23	9.26	23.05	32.31			23	10.5127	10.6431	21.1558			23	0.772874	0.342608	1.11548
	26	6	0.18	0.911821			26	7.84	45.75	53.59			26	7.77305	15.1712	22.9443			26	0.511131	0.382932	0.894063
	27	5	0.156944	0.950944			27	8.76	34.27	43.03			27	8.27618	11.4983	19.7745			27	0.564146	0.300035	0.864181
	38	3	0.443671	0.955206			38	10.68	13.82	24.5			38	9.32271	4.9928	14.3155			38	0.614018	0.154547	0.768565
	39	5	0.0838513	0.944523			39	8.28	37.92	46.2			39	8.1729	11.3448	19.5177			39	0.562757	0.246957	0.809714
	AVE	3.38095	0.206122	0.906713			AVE	8.94231	29.0877	30.1981			AVE	8.9737	10.7698	17.284			AVE	0.606024	0.288723	0.815913
	SD	2.12639	0.0957547	0.0842406			SD	1.11238	10.2455	12.7847			SD	1.71788	3.30415	4.56697			SD	0.131981	0.0895456	0.181391
	CV		0.464553	0.0929076			CV	0.124395	0.352228	0.42336			CV	0.191435	0.306797	0.264231			CV	0.217782	0.310144	0.222316
	Model	# of branches	Primary branch point	last dendritic tip		Length (micron)	Model	Ciliary constriction to primary branch point	Distal branched segments(summed)	Total		Surface area (micron^2)	Model	Ciliary constriction to primary branch point	Distal branched segments(summed)	Total		Volume (micron^3)	Model	Ciliary constriction to primary branch point	Distal branched segments (summed)	Total		V/L ratio	Model	Ciliary constriction to primary branch point	Distal branched segments (summed)	Total		S/V ratio	Model	Ciliary constriction to primary branch point	Distal branched segments (summed)	Total
	2	6	0.275743	0.898887		Unbranched	1			18.61		Unbranched	1			14.2904		Unbranched	1			0.786118		Unbranched	1			0.0422417		Unbranched	1			18.1784
	3	6	0.181681	0.935451			4			17.13			4			12.1495			4			0.534626			4			0.0312099			4			22.7252
	7	2	0.0992834	0.953467			6			19.21			6			13.67			6			0.684089			6			0.0356111			6			19.9828
	8	5	0.304675	0.969259			9			15.17			9			11.8519			9			0.77047			9			0.0507891			9			15.3827
	13	5	0.110292	0.875342			10			18.04			10			13.4104			10			0.622891			10			0.0345283			10			21.5293
	14	7	0.223732	0.876958			11			14.23			11			11.7652			11			0.637194			11			0.0447782			11			18.4641
	15	4	0.207779	0.633236			17			17.29			17			13.8571			17			0.730552			17			0.0422529			17			18.968
	18	5	0.140211	0.956625			19			20.09			19			15.3038			19			0.736521			19			0.0366611			19			20.7785
	23	4	0.271725	0.925553			AVE			17.4713			AVE			13.2873			AVE			0.687808			AVE			0.039759			AVE			19.5011
	26	6	0.18	0.911821			SD			1.85243			SD			1.18483			SD			0.0798063			SD			0.00598422			SD			2.13432
	27	5	0.156944	0.950944			CV			0.106028			CV			0.08917			CV			0.11603			CV			0.150512			CV			0.109446
	38	3	0.443671	0.955206
	39	5	0.0838513	0.944523		Length (micron)	Model	Ciliary constriction to primary branch point	Distal branched segments (summed)	Total		Surface area (micron^2)	Model	Ciliary constriction to primary branch point	Distal branched segments (summed)	Total		Volume (micron^3)	Model	Ciliary constriction to primary branch point	Distal branched segments (summed)	Total		V/L ratio	Model	Ciliary constriction to primary branch point	Distal branched segments (summed)	Total		S/V ratio	Model	Ciliary constriction to primary branch point	Distal branched segments (summed)	Total
	AVE	4.84615	0.206122	0.906713		Branched	2	10.45	22.2	32.65		Branched	2	6.57	11.9366	18.5066		Branched	2	0.463594	0.386912	0.850506		Branched	2	0.0443631	0.0174284	0.0260492		Branched	2	14.1719	30.8509	21.7595
	SD	1.29176	0.0957547	0.0842406			3	8.22	39.72	47.94			3	8.63715	14.352	22.9891			3	0.578665	0.375707	0.954372			3	0.0703972	0.00945889	0.0199076			3	14.926	38.1999	24.0882
	CV	0.266553	0.464553	0.0929076			7	7.1	17.7	24.8			7	5.82868	5.99883	11.8275			7	0.287899	0.14298	0.430879			7	0.0405492	0.00807796	0.0173741			7	20.2456	41.9558	27.4497
							8	10.39	37.28	47.67			8	12.1852	13.8916	26.0768			8	0.767616	0.367767	1.13538			8	0.0738803	0.009865	0.0238176			8	15.8741	37.7729	22.9674
							13	8.07	35.98	44.05			13	10.2175	13.9217	24.1392			13	0.723258	0.370267	1.09353			13	0.089623	0.0102909	0.0248246			13	14.127	37.5991	22.0747
							14	10.27	31.14	41.41			14	11.1974	11.1278	22.3252			14	0.742008	0.288687	1.0307			14	0.07225	0.00927062	0.02489			14	15.0907	38.5463	21.6604
							15	8.55	11.73	20.28			15	8.3836	5.2202	13.6038			15	0.611529	0.150028	0.761557			15	0.0715239	0.0127901	0.0375521			15	13.7092	34.7948	17.8631
							18	8.38	27.58	35.96			18	9.58102	9.90901	19.49			18	0.678815	0.243967	0.922782			18	0.0810042	0.00884579	0.0256613			18	14.1143	40.6162	21.1209
							23	9.26	23.05	32.31			23	10.5127	10.6431	21.1558			23	0.772874	0.342608	1.11548			23	0.0834637	0.0148637	0.0345243			23	13.6021	31.0651	18.9656
							26	7.84	45.75	53.59			26	7.77305	15.1712	22.9443			26	0.511131	0.382932	0.894063			26	0.0651953	0.0083701	0.0166834			26	15.2075	39.6186	25.6629
							27	8.76	34.27	43.03			27	8.27618	11.4983	19.7745			27	0.564146	0.300035	0.864181			27	0.0644002	0.00875502	0.0200832			27	14.6703	38.3232	22.8823
							38	10.68	13.82	24.5			38	9.32271	4.9928	14.3155			38	0.614018	0.154547	0.768565			38	0.0574923	0.0111828	0.03137			38	15.1831	32.3061	18.6263
							39	8.28	37.92	46.2			39	8.1729	11.3448	19.5177			39	0.562757	0.246957	0.809714			39	0.0679658	0.00651258	0.0175263			39	14.523	45.9383	24.1044
							AVE	8.94231	29.0877	38.03			AVE	8.9737	10.7698	19.7435			AVE	0.606024	0.288723	0.894746			AVE	0.0678545	0.0104394	0.0246357			AVE	15.0342	37.5067	22.2481
							SD	1.11238	10.2455	10.0452			SD	1.71788	3.30415	4.11695			SD	0.131981	0.0895456	0.181431			SD	0.0135585	0.00288009	0.00634509			SD	1.6301	4.18346	2.65264
							CV	0.124395	0.352228	0.264138			CV	0.191435	0.306797	0.208521			CV	0.217782	0.310144	0.202773			CV	0.199817	0.275887	0.257557			CV	0.108426	0.111539	0.11923
